# Supplementary material
Source: publisher site journal article supplement (https://www.dovepress.com/article/593807)
Supplement: Supplementary file 1 [file 593807%20Revised%20Supplementary%20Materials.docx]

**Supplementary figures and figure legends**


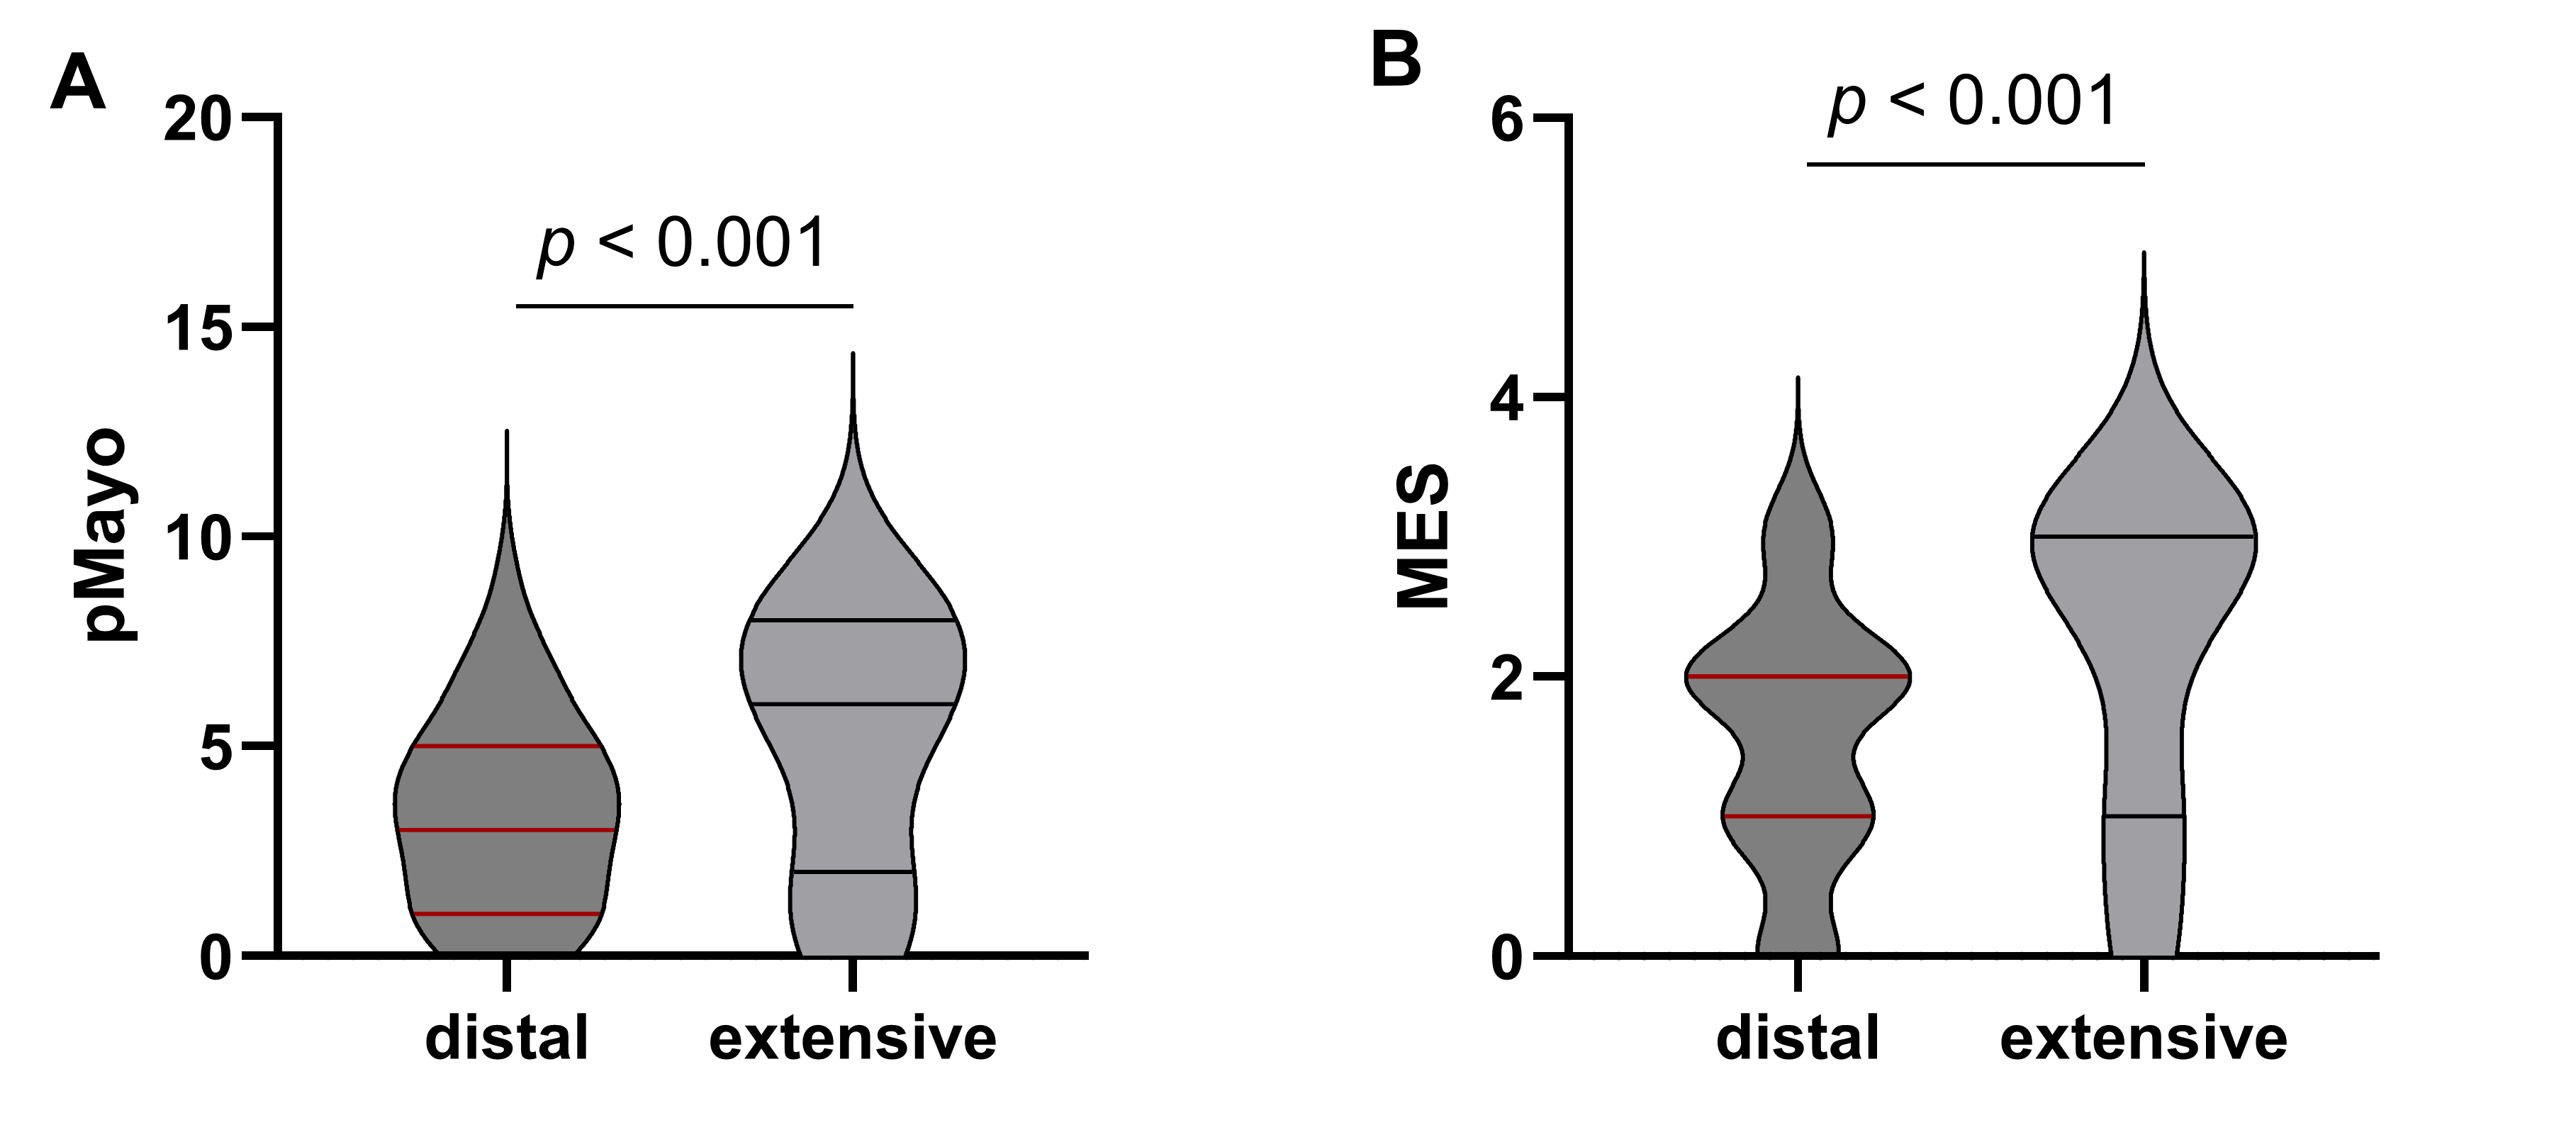


Supplementary figure 1. (A) Comparison of p-Mayo scores between patients with distal and extensive UC. (B) Comparison of MES between patients with distal and extensive UC. The Mann-Whitney test.


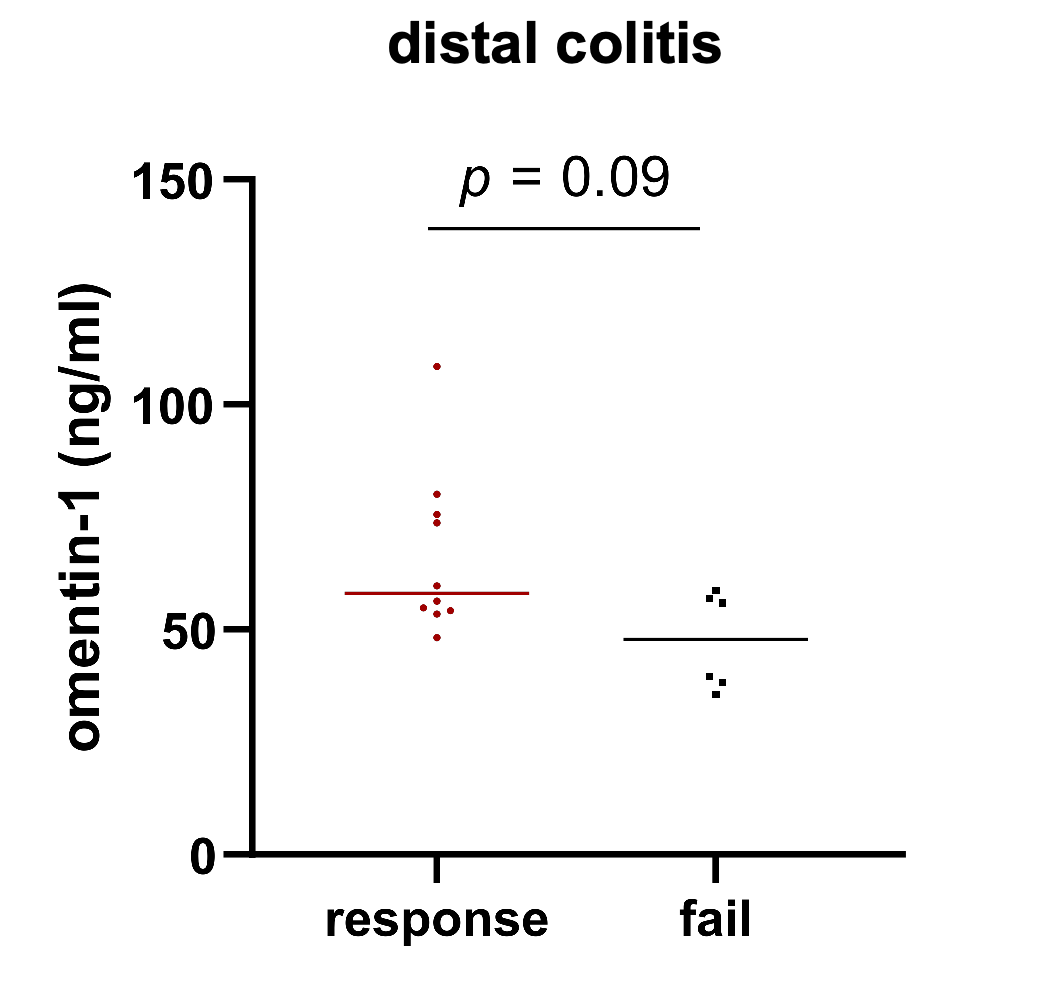


Supplementary figure 2. Baseline levels of serum omentin-1 between IFX responders and non-responders were determined in patients with distal UC. *p* = 0.09, The Mann-Whitney test.
